# Supplementary material for: Engineering the oleaginous red yeast Rhodotorula glutinis for simultaneous β-carotene and cellulase production
Source: PubMed Central journal article supplement (PMC6052021; doi:10.1038/s41598-018-29194-z), 2018-07-18
Supplement: 41598_2018_29194_MOESM1_ESM.pdf [file 41598_2018_29194_MOESM1_ESM.pdf]

## Supplementary Information

### Engineering the oleaginous red yeast *Rhodotorula glutinis* for simultaneous $\beta$ -carotene and cellulase production

Hong-Wei Pi<sup>1, 2</sup>, Marimuthu Anandharaj<sup>2, 3, 4</sup>, Yi-Ying Kao<sup>2</sup>, Yu-Ju Lin<sup>2</sup>, Jui-Jen Chang<sup>5, \*</sup>, Wen-Hsiung Li<sup>2, 6, 7, \*</sup>

#### Affiliations:

<sup>1</sup>Ph.D. Program in Microbial Genomics, National Chung Hsing University and Academia Sinica, Taiwan.

<sup>2</sup>Biodiversity Research Center, Academia Sinica, Nankang, Taipei 11529, Taiwan.

<sup>3</sup>Molecular and Biological Agricultural Sciences Program, Taiwan International Graduate Program, National Chung Hsing University and Academia Sinica, Taipei 11529, Taiwan.

<sup>4</sup>Graduate Institute of Biotechnology, National Chung Hsing University, Taichung 40227, Taiwan.

<sup>5</sup>Department of Medical Research, China Medical University Hospital, China Medical University, No. 91 Hsueh-Shih Road, Taichung 402, Taiwan.

<sup>6</sup>Biotechnology center, National Chung Hsing University, Taichung 40227, Taiwan.

<sup>7</sup>Department of Ecology and Evolution, University of Chicago, Chicago 60637, USA.

\*Corresponding authors address: Biodiversity Research Center, Academia Sinica, 128 Academia Road, Sec. 2, Nankang, Taipei 115, Taiwan.

#### Corresponding authors E-mail address:

whli@uchicago.edu (W-H Li) and lancecjj@gmail.com (J-J Chang)

**Table S1.** The minimal inhibitory concentration (MIC) tested in *R. glutinis*.

| Medium | Antibiotic | $\mu\text{g/ml}$ | 1                                                                                 | $10^{-1}$                                                                         | $10^{-2}$                                                                         | $10^{-3}$                                                                          | $10^{-4}$                                                                           | $10^{-5}$ | $10^{-6}$ | $10^{-7}$ |
|--------|------------|------------------|-----------------------------------------------------------------------------------|-----------------------------------------------------------------------------------|-----------------------------------------------------------------------------------|------------------------------------------------------------------------------------|-------------------------------------------------------------------------------------|-----------|-----------|-----------|
| YP2D   | -          | -                |  |  |  |  |  | -         | -         | -         |
| YP2D   | Zeocin     | 100              | -                                                                                 | -                                                                                 | -                                                                                 | -                                                                                  | -                                                                                   | -         | -         | -         |
| YP2D   | Zeocin     | 200              | -                                                                                 | -                                                                                 | -                                                                                 | -                                                                                  | -                                                                                   | -         | -         | -         |
| YP2D   | G418       | 100              | -                                                                                 | -                                                                                 | -                                                                                 | -                                                                                  | -                                                                                   | -         | -         | -         |
| YP2D   | G418       | 200              | -                                                                                 | -                                                                                 | -                                                                                 | -                                                                                  | -                                                                                   | -         | -         | -         |
| YP2D   | Hygromycin | 100              | -                                                                                 | -                                                                                 | -                                                                                 | -                                                                                  | -                                                                                   | -         | -         | -         |
| YP2D   | Hygromycin | 200              | -                                                                                 | -                                                                                 | -                                                                                 | -                                                                                  | -                                                                                   | -         | -         | -         |

\* Number 1 to  $10^{-7}$  represented dilution of *R. glutinis* culture fluid in 10  $\mu\text{l}$  drop.

**Table S2.** The primers used in *R. glutinis* genotype validation.

| No. | Primer name | Sequence (5'-3')                 |
|-----|-------------|----------------------------------|
| 1   | crtE-13F    | AACATCCTCACAGCAATTCCAACCTCGAGTTT |
| 2   | crtE-1065R  | TCCAATTTGACGTTCTTCCCCGTTCTTCCT   |
| 3   | crtI-92F    | AAGGTTTCCAGGTCACGGTGTTCGAGAAGA   |
| 4   | crtI-1551R  | TCTGGAGCTGGGGATCGGTCAAAGGATTTCG  |
| 5   | crtYB-26F   | TCCATCTGATCTATACTCTCCAATTCTTG    |
| 6   | crtYB-1817R | GGTCAATTCCCTTATAAGAATGTTTGGCAA   |
| 7   | tHMG1-64F   | TCCAACCACAATGAAAAACAATCACCATCC   |
| 8   | tHMG1-1410R | AGCGATAACTCACCGGCCATCACCGCA      |
| 9   | CBHI-26F    | AGACTCACCCGCCTCTGACATGGCAGAAAT   |
| 10  | CBHI-1438R  | AGGACCTGGCAAGTTGTGCCGCTGGCGCA    |
| 11  | CBHII-90F   | ATACTACGCTCAATGTACCCCAGCTGCCGG   |
| 12  | CBHII-1062R | TTACACCAGTCACCCCAAGCTTGTTGACCA   |
| 13  | EgIII-110F  | GGCCACCATCCGGTCACGAATTGTGCTCCT   |
| 14  | EgIII-1106R | CAGTCGGTGTTCGTCAGGACATACGTGC     |
| 15  | EgI-47F     | CCGCTCTCCCCAGCCGCCAGATGAAGAAGC   |
| 16  | EgI-1495R   | GTCGTTCTGGGCCTTGCAGGTGTAGGGGCT   |
| 17  | EgIA-103F   | ACCGGCAGCCAGTGTGTATATGTCGACAAA   |
| 18  | EgIA-576R   | TGGCGGGAAAGCCTTGGTTCTGAGTGAGAT   |
| 19  | BGS-300F    | TATTAACCTTCGCTCTTGCTCCATCTGTAGG  |
| 20  | BGS-1960R   | TTCAGCGTCAACATCATAGTAAGAAAGATC   |
| 21  | KanMx-69-F  | GTATAAATGGGCTCGCGATAATGTCGGGCA   |
| 22  | KanMx-712-R | AAAACCTCACCGAGGCAGTTCCATAGGATGG  |
| 23  | ICL-F       | TTCCCTTTTTTATACCTTTT             |
| 24  | crtI-F      | TGGGAAAAGAACAAGATCAG             |
| 25  | crtI-R      | CAGAAAGCAAGAACAACCAACGGAT        |

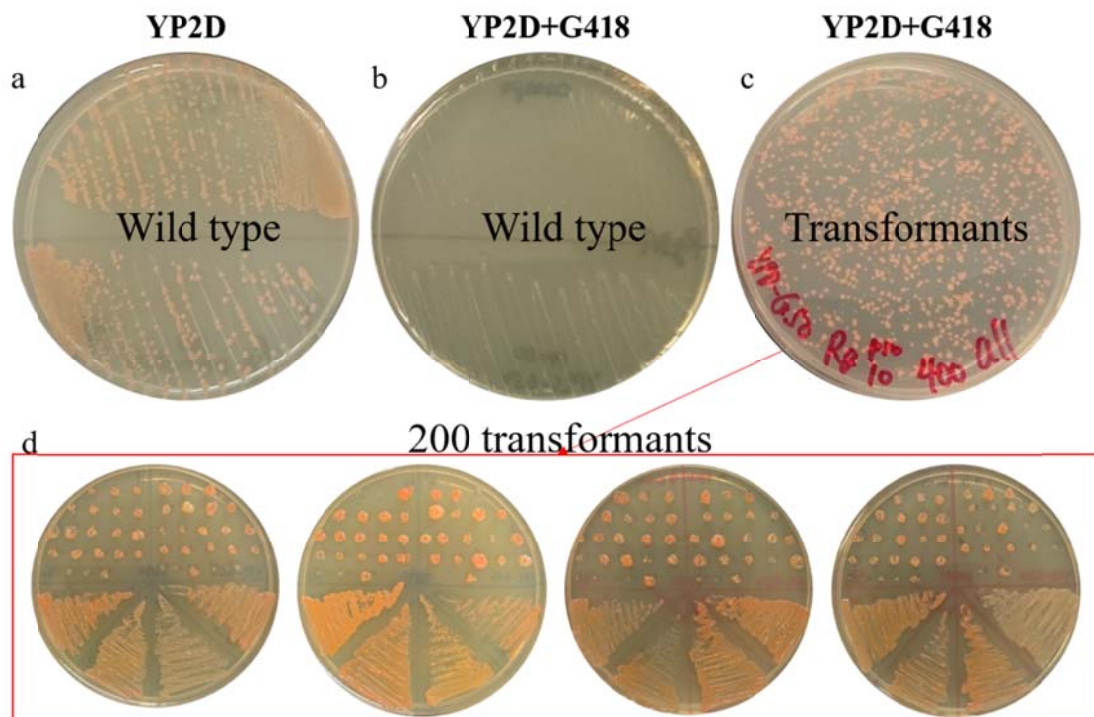

**Figure S1.** *R. glutinis* transformants on the G418 selective YP2D. *R. glutinis* wild type grew on YP2D, without G418 (a) and with G418 (b). (c) Transformants with *KanMx* gene can grow on the G418 selective YP2D and (d) stably subculture for 3 generations.

(a) *crtI* gene, primers 23, 24 and 25.

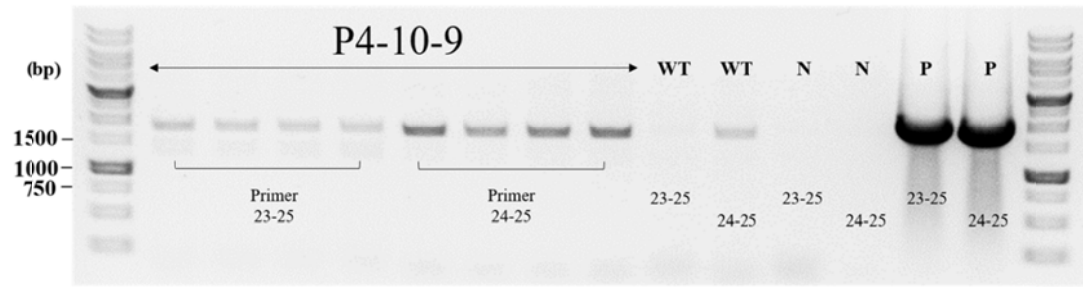

(b) *cbhI* gene, primers 9 and 10.

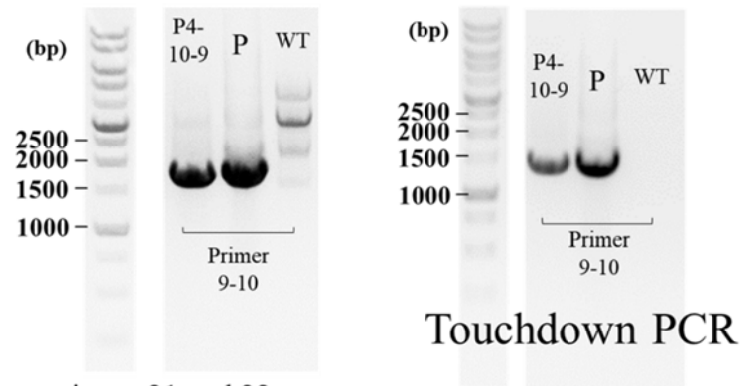

(c) *KanMx* gene, primers 21 and 22.

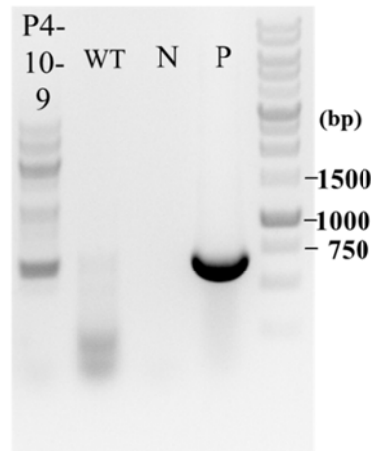

**Figure S2.** Genotype validating of transformants P4-10-9 by PCR amplification. (a) The primers 23 and 25 can amplify from the ICL promoter region to the end of *crtI* gene; the primers 24 and 25 can amplify the *crtI* gene. (b) The designer 30 bp long primers and touchdown PCR can amplify the correct *cbhI* gene. (c) The designer 30 bp long primers can amplify the correct *KanMx* gene.

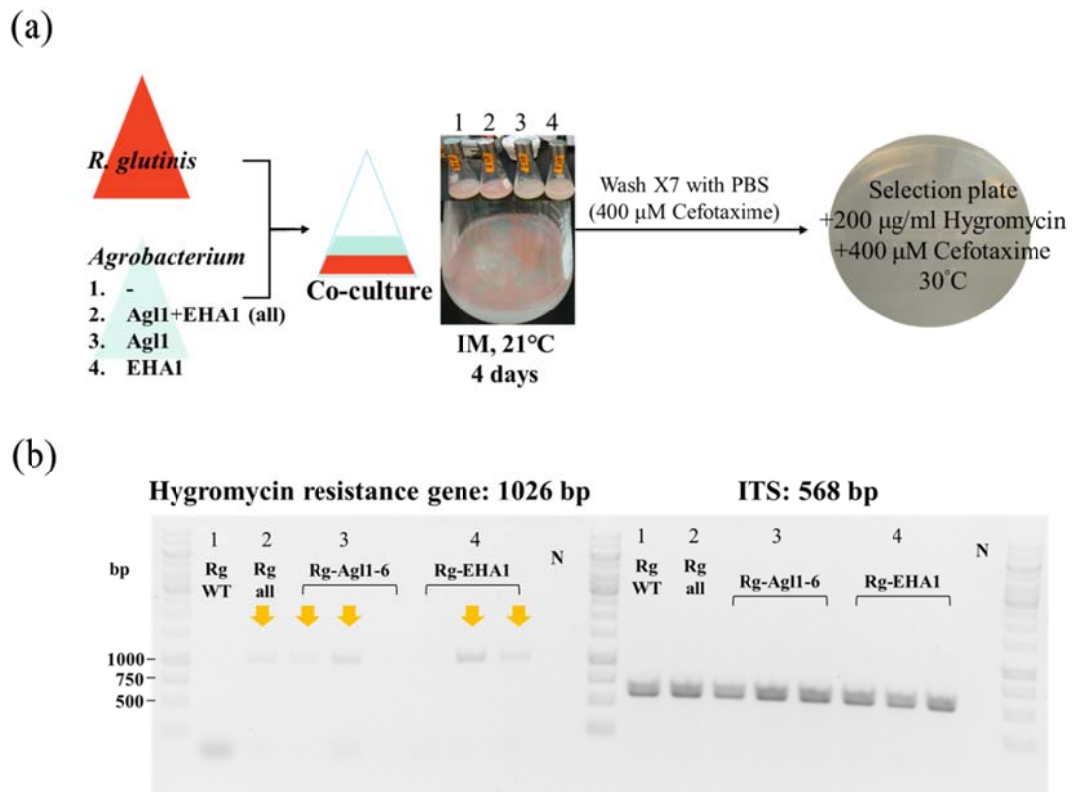

**Figure S3.**

(a) The *Agrobacterium*-mediated transformation (ATMT) system was applied to transform *R. glutinis* (Lin et al., 2014). Different *Agrobacterium* stains (AglI and EHA1) were tested. (b) Genotype validation of transformants by PCR amplification. Hygromycin resistance gene was integrated into the *R. glutinis* chromosome. Internal transcribed spacer (ITS) was used to confirm the *R. glutinis* species.

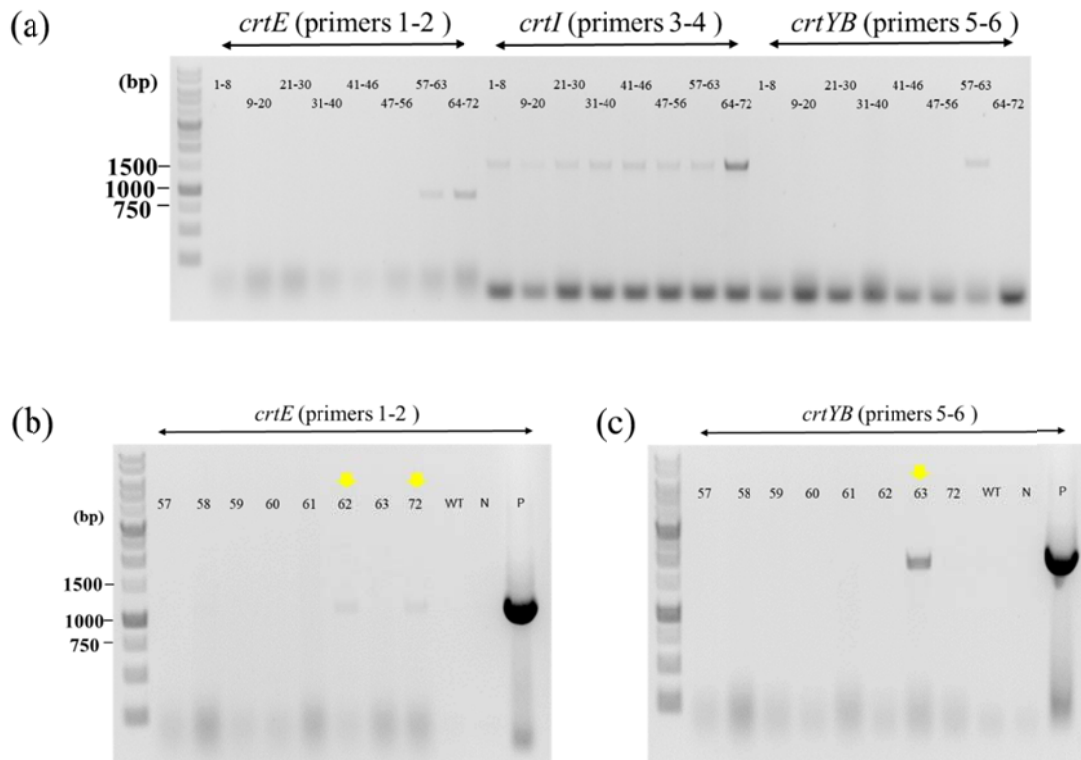

**Figure S4.** Genotype validation of 2<sup>nd</sup> time transformants by PCR amplification. (a) The mix colonies PCR showed that 57-72 transformants contained the *crtE* gene and 57-63 transformants contained the *crtYB* gene. (b) The single colony PCR showed that transformants 62 and 72 contained the *crtE* gene. (c) The single colony PCR showed that transformants 63 contained the *crtYB* gene.

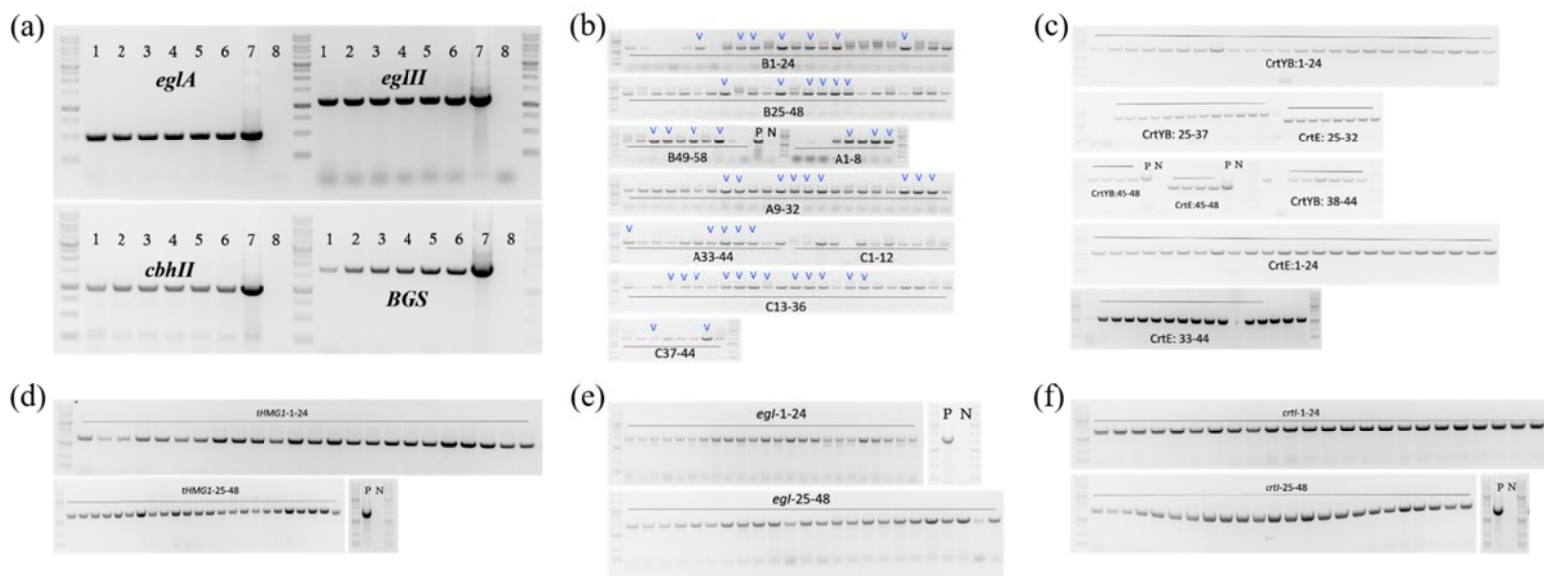

**Figure S5.** Genotype validation of candida transformants by PCR amplification.

(a) To confirm *EgIII*, *EglA*, *CBHII* and *BGS* genes. The number represented mix colonies (1: 1A to 25A, 2: 26A to 44A and 1B to 5B, 3: 6B to 31B, 4: 32B to 58B, 5: 1C to 25C, 6: 26C to 44C, 7: Positive (cassette), 8: Negative (QE)).

(b) To confirm *CBHI* gene. The marker represented the single colony that contained the correct *CBHI* gene size for further genotype validation.

(c) To confirm *crtE* and *crtYB* genes.

(d) To confirm *tHMG1* gene.

(e) To confirm *Egl* gene.

(f) To confirm *crtI* gene.

The 48 colonies were selected because they all contained *EgIII*, *EglA*, *CBHII*, *BGS*, *CBHI*, *crtE*, *crtYB*, *tHMG1*, *Egl* and *crtI* genes.



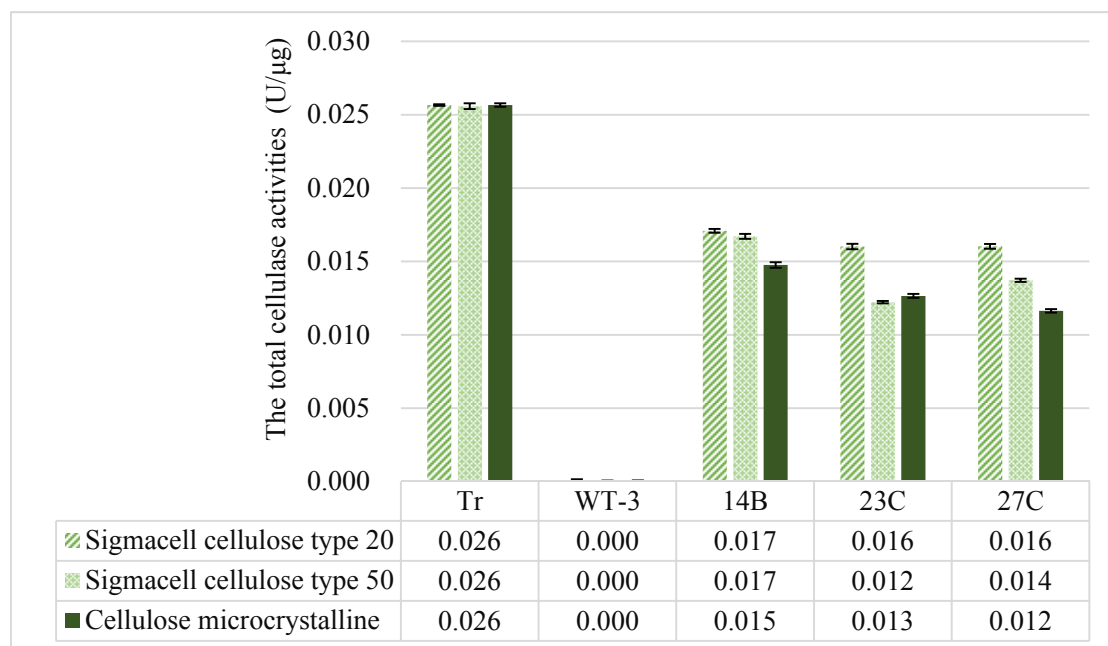

**Figure S6.** Total cellulase activity assay of *R. glutinis* wild type, P4-10-9-63Y-14B, -23C and -27C. The 0.82U commercial enzyme Celluclast® 1.5L applied as standard. All samples used 32 μg of total protein to conduct the assay.

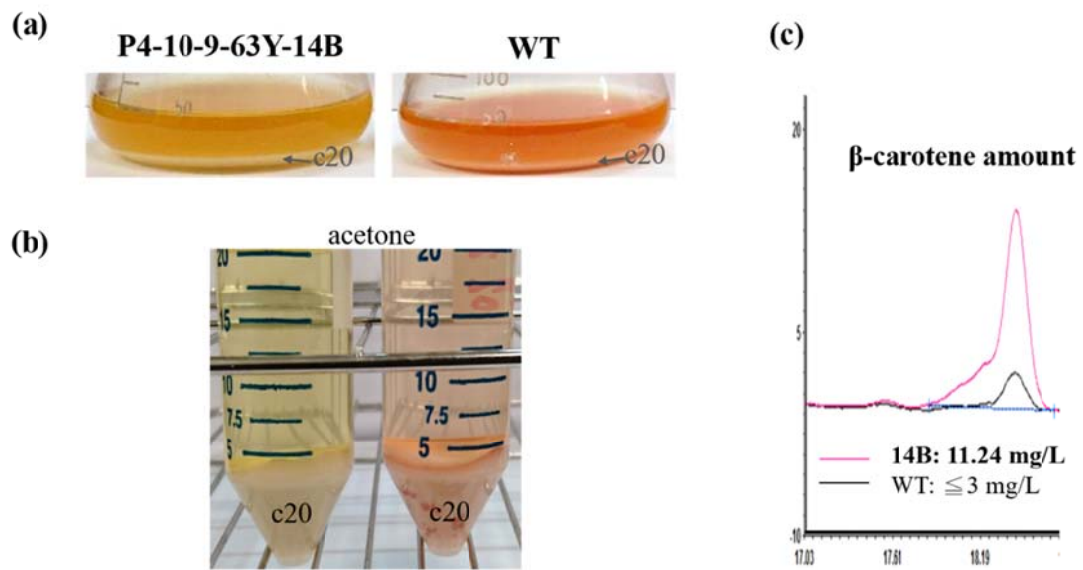

**Figure S7.** Compared the amounts of  $\beta$ -carotene between *R. glutinis* transformants P4-10-9-63Y-14B and wild type in 50 ml of YP medium with 0.5% glycerol and 2% sigmacell cellulose type 20 (c20). (a) Colonies in the medium and the c20 substrate. (b) The 50 ml acetone extraction. (c) HPLC results.

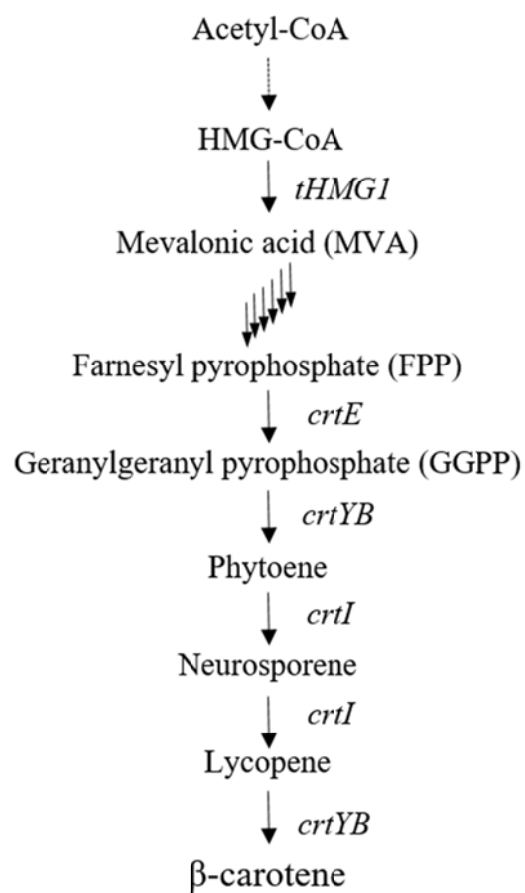

**Figure S8.** Engineered  $\beta$ -carotene biosynthetic pathway in *R. glutinis*. This pathway shows  $\beta$ -carotene biosynthesis from the Acetyl-CoA in *R. glutinis* (Kot *et al.*, 2016).
